# Supplementary material
Source: MDPI journal article supplement (https://www.mdpi.com/2311-5637/8/2/72)
Supplement: s1 [file s1]

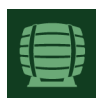**Table S1.** Chemical compositions of substrates

| Items         | RS    | BFRS  |
|---------------|-------|-------|
| DM, %         | 82.35 | 46.19 |
| CP, %         | 4.76  | 4.99  |
| NDF, %        | 75.05 | 69.91 |
| NDS, %        | 24.95 | 30.09 |
| ADF, %        | 36.91 | 36.37 |
| Lignin, %     | 5.93  | 4.76  |
| Hemicellulose | 38.15 | 33.54 |
| Cellulose     | 28.85 | 29.73 |

DM: dry matter, CP: crude protein, NDF: neutral detergent fiber, NDS; neutral detergent solute, ADF: acid detergent fiber, ADL: acid detergent lignin, RS: rice straw, BFRS: bio-fermented rice straw.

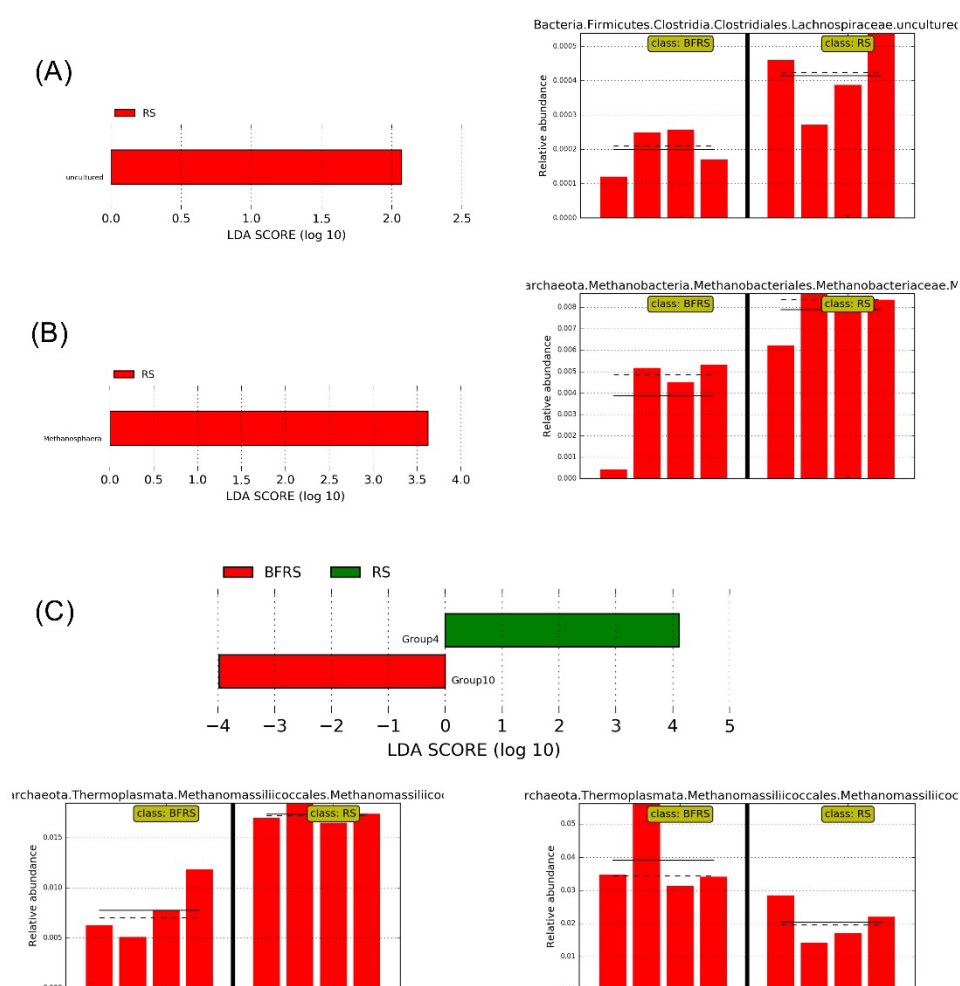

**Figure S1.** LEfSe analysis of the loosely attached bacteria (A), and archaea (B), and tightly attached archaea (C). RS: rice straw, BFRS: bio-fermented rice straw.
